# Supplementary material for: A rapid review of the evidence on models of service delivery for correctional centre-based mothers and children’s units: does our approach need to change?
Source: PubMed Central journal article supplement — BMJ Glob Health. 2024 May 7;9(5):e012979. doi: 10.1136/bmjgh-2023-012979 (PMC11085710; doi:10.1136/bmjgh-2023-012979), 2024-05-07
Supplement: bmjgh-2023-012979supp001.pdf [file bmjgh-2023-012979supp001.pdf]

**Supplementary Materials****Supplementary Table 1:** Population, Context, Phenomena of Interest, Study Design and Time Frame

| Criteria                     | Description                                                                                                                                      |
|------------------------------|--------------------------------------------------------------------------------------------------------------------------------------------------|
| <b>Population</b>            | Women residing in prison with their child/children                                                                                               |
| <b>Context</b>               | Mothers and children's units in custodial settings                                                                                               |
| <b>Phenomena of interest</b> | Best practice models of service delivery for mothers and children<br>Best practice principles<br>Program aims and limitations<br>Recommendations |
| <b>Study design</b>          | Qualitative and quantitative empirical studies                                                                                                   |
| <b>Time frame</b>            | Published from 2010 until the end of April 2022                                                                                                  |

**Supplementary Table 2:** Summary of search strategy for electronic database searches**In text search**

(mother\*) OR (mum\* OR mom) OR (pregnan\*)

AND

(children\*) OR (bab\*) OR (child\*) OR (infact\*) OR (Nurser\*)

AND

(program\*) OR (intervention\*) OR (hous\*) OR (service\*) OR (Deliver\*) OR (Nurser\*) OR (unit)

AND

(prison) OR (gaol OR jail) OR (Incarcerat\*) OR (imprison\*) OR (custody) OR (detention) OR (inmate\*)  
OR (offend\*) OR (correction\*)**Supplementary Table 3:** Inclusion and Exclusion Criteria

| Inclusion and Exclusion Criteria            |                                                                                         |
|---------------------------------------------|-----------------------------------------------------------------------------------------|
| Included                                    | Excluded                                                                                |
| Women who reside in prison with their child | Studies published before 2010                                                           |
| All reported outcomes                       | Women in prison without their child                                                     |
| Published literature from 2010 onwards      | Women not in prison                                                                     |
| Publications in all languages               | Pregnant women that did not give birth and reside with their infant in a prison setting |
|                                             | Grey literature                                                                         |
|                                             | Books and theses                                                                        |
|                                             | Full text not available                                                                 |
|                                             | Reviews                                                                                 |
|                                             | Studies without a methods section                                                       |

**Supplementary Table 4:** M&C unit aims

| Unit aims                             |                      |
|---------------------------------------|----------------------|
| <b>Reducing recidivism</b>            | (1-3) (4, 5) (6) (7) |
| <b>Maternal bonding or attachment</b> | (4, 6) (7, 8)        |

|                                                                                                                              |            |
|------------------------------------------------------------------------------------------------------------------------------|------------|
| <b>Improved parenting</b>                                                                                                    | (4, 9, 10) |
| <b>Rehabilitation of the mother</b>                                                                                          | (9) (11)   |
| <b>Improved breastfeeding outcomes</b>                                                                                       | (12, 13)   |
| <b>Improved healthcare outcomes</b>                                                                                          | (9) (7)    |
| <b>Improved long-term effects of nursery programs on child development and short- and long-term bi-generational outcomes</b> | (3)        |

**Supplementary Table 5:** Admission criteria for mothers and children's units

|                              | <b>Criteria</b>                                                                                                                                                     | <b>Studies</b>      |
|------------------------------|---------------------------------------------------------------------------------------------------------------------------------------------------------------------|---------------------|
| <b>Custody of child</b>      | Women must have custody of the children in order to apply for a placement                                                                                           | (4, 7)              |
| <b>Criminal history</b>      | Women must not have a history of violence including current or past offences related to violence or prior convictions of child abuse                                | (1-4, 7, 9, 14, 15) |
|                              | Women must not have a history of sex offences                                                                                                                       | (7)                 |
|                              | Women must have no outstanding warrants, no major infractions since entering the institution, no open children's protective services cases, and no history of arson | (2)                 |
| <b>Women's mental health</b> | Women must meet specified criteria regarding their medical and mental health status                                                                                 | (4, 7, 14, 16)      |
|                              | Women must have no previous history of a psychotic disorder or a personality disorder                                                                               | (16)                |
| <b>Pregnant women</b>        | Women must be pregnant and due to deliver during their sentence period                                                                                              | (4, 15)             |
|                              | Women must have a release date within 18 months after the projected delivery date                                                                                   | (4)                 |
| <b>Sentence length</b>       | Women must have a short sentence (not specified)                                                                                                                    | (11)                |
|                              | Women must have a sentence less than 24 months                                                                                                                      | (1)                 |
|                              | Women must have a sentence of 30 months or less                                                                                                                     | (2)                 |

1. Carlson JR. Prison nurseries: A way to reduce recidivism. *The Prison Journal*. 2018;98(6):760-75.
2. Condon M-C. Early relational health: Infants' experiences living with their incarcerated mothers. *Smith College Studies in Social Work*. 2017;87(1):5-25.
3. Goshin LS, Byrne MW, Blanchard-Lewis B. Preschool outcomes of children who lived as infants in a prison nursery. *The Prison Journal*. 2014;94(2):139-58.
4. Fritz S, Whiteacre K. Prison nurseries: Experiences of incarcerated women during pregnancy. *Journal of Offender Rehabilitation*. 2016;55(1):1-20.
5. Gobena EB, Hean SCPD. The experience of incarcerated mothers living in a correctional institution with their children in Ethiopia. *Journal of Comparative Social Work*. 2019;14(2):30-54.

6. Huber MO, Venegas ME, Contreras CM. Group intervention for imprisoned mother-infant dyads: Effects on mother's depression and on children's development. *Revista Ces Psicologia*. 2020;13(3):222-38.
7. Walker JR, Baldry E, Sullivan EA. Residential programmes for mothers and children in prison: Key themes and concepts. *Criminology & Criminal Justice*. 2021;21(1):21-39.
8. Slead M, Baradon T, Fonagy P. New Beginnings for mothers and babies in prison: A cluster randomized controlled trial. *Attachment & Human Development*. 2013;15(4):349-67.
9. Blanchard A, Bebin L, Leroux S, Roussey M, Horel MA, Desforges M, et al. Infants living with their mothers in the Rennes, France, prison for women between 1998 and 2013. Facts and perspectives. *Archives De Pediatrie*. 2018;25(1):28-34.
10. Kearney JA, Byrne MW. Reflective functioning in criminal justice involved women enrolled in a mother/baby co-residence prison intervention program. *Archives of Psychiatric Nursing*. 2018;32(4):517-23.
11. Byrne MW, Goshin LS, Joestl SS. Intergenerational transmission of attachment for infants raised in a prison nursery. *Attachment & Human Development*. 2010;12(4):375-93.
12. Chaves LH, de Araújo ICA. Pregnancy and maternity in prison: Healthcare from the perspective of women imprisoned in a maternal and child unit. *Physis*. 2020;30(1):1-22.
13. Diuana V, Corrêa MCDV, Ventura M. Mulheres nas prisões brasileiras: tensões entre a ordem disciplinar punitiva e as prescrições da maternidade. *Physis: Revista de Saúde Coletiva*. 2017;27(3):727-47.
14. Borelli JL, Goshin L, Joestl S, Clark J, Byrne MW. Attachment organization in a sample of incarcerated mothers: Distribution of classifications and associations with substance abuse history, depressive symptoms, perceptions of parenting competency and social support. *Attachment & Human Development*. 2010;12(4):355-74.
15. Luther K, Gregson J. RESTRICTED MOTHERHOOD: Parenting in a Prison Nursery. *International Journal of Sociology of the Family*. 2011;37(1):85-103.
16. Dolan RM, Birmingham L, Mullee M, Gregoire A. The mental health of imprisoned mothers of young children: a follow-up study. *Journal of Forensic Psychiatry & Psychology*. 2013;24(4):421-39.
