# Supplementary material for: A rapid review of the evidence on models of service delivery for correctional centre-based mothers and children’s units: does our approach need to change?
Source: PubMed Central journal article supplement — BMJ Glob Health. 2024 May 7;9(5):e012979. doi: 10.1136/bmjgh-2023-012979 (PMC11085710; doi:10.1136/bmjgh-2023-012979), 2024-05-07
Supplement: bmjgh-2023-012979supp002.pdf [file bmjgh-2023-012979supp002.pdf]

**Supplementary Table 6:** M&Cs Key components and implications for practice

| Key Component                    | Context / need       | Implications for practice                                                                                                                                                 |                                                                                                                                                                      |
|----------------------------------|----------------------|---------------------------------------------------------------------------------------------------------------------------------------------------------------------------|----------------------------------------------------------------------------------------------------------------------------------------------------------------------|
| <b>Information and knowledge</b> | Admission processes  | Access to admission process steps to assess eligibility. (27, 29-32, 39, 42, 51, 61)                                                                                      | Transparent and easily available admission process steps, communicated clearly at first contact with Corrective Services and reception at the correctional centre    |
|                                  | Application process  | Support for women with low literacy or culturally and linguistically diverse (CALD) backgrounds<br>Variable application processes and approval times (31, 42, 51, 56, 61) | Advocate and/or a support person (i.e. Case manager) made available to mothers to aid with their application.                                                        |
|                                  | Eligibility criteria | Security level may exclude women<br>Pregnancy status may be an inclusion/exclusion criteria<br>Sentence length may exclude some women on remand, short or long sentences  | Clear and early communication to each applicant regarding any exclusion criteria                                                                                     |
|                                  | Age of the child     | Centres have different age limits for the children able to reside within a M&C (27) (28) (31, 33, 40, 41, 44, 49) (53, 55) (58) (59) (60) (29)                            | Define age limits for children to reside in the unit at the earliest possible time point                                                                             |
|                                  | Length of stay       | Length of stay permitted for the child/mother can be dependent on the length of the mother's sentence                                                                     | Communication of the length of stay for the centre and forming a plan for eligible women who will be separated from their child due to the length of their sentence. |
|                                  | Unit Capacity        | Variable unit capacity limits and availability by centre                                                                                                                  | If eligible, early communication regarding available places in the M&C unit.                                                                                         |
| <b>Environment</b>               | Accommodation        | Separate dwelling from CC population (30, 35, 37, 41, 44, 56, 58, 60) (61) (27-29, 31, 32, 39, 40, 42, 45) (33, 36, 49) (53, 54, 59)                                      | Available description of the features of the accommodation accompanied by pictures                                                                                   |
|                                  |                      | Family environment, child friendly(51) and safe for the child(61)                                                                                                         | Tailor the environment to be child friendly and stable for children                                                                                                  |

|                                  |                                                                                                                                                    |                                                                                                                                                                        |
|----------------------------------|----------------------------------------------------------------------------------------------------------------------------------------------------|------------------------------------------------------------------------------------------------------------------------------------------------------------------------|
|                                  | Minimise the overstimulation and incompatibility of the CC environment on the child(43, 51, 54)                                                    | Appropriate lighting and noise levels suitable for infants and children to support sleep and development                                                               |
|                                  | Outdoor play area for comparable play to the outside                                                                                               | Availability of outdoor play areas to support the development and facilitate play with other children                                                                  |
|                                  | Toys and play equipment access                                                                                                                     | Readily accessible age-appropriate toys and equipment for development that can be taken to their room for extended periods                                             |
| Socialisation for the child      | Socialisation with other children, mothers and people outside of the CC environment(38, 54) (43, 51)                                               | Opportunity for children to play and interact with other children and mothers in an appropriate or supervised setting.                                                 |
| Responsibility for the child     | Sole responsibility for their child. (38, 41, 44, 50, 61)                                                                                          | Shared responsibility for the child between the mother and correctional centre to reduce the burden on the mother.                                                     |
| Childcare                        | Childcare that is safe and acceptable to the mother                                                                                                | Provision of safe, acceptable childcare options for the mother to participate in other programs and not be disadvantaged or excluded as a result of residing in an M&C |
| Education and work placement     | Exclusion from rehabilitation programs, educational and vocational training, and work assignments(46) (55)                                         | Ensuring eligibility of mothers within M&C to participate in all programs available to women outside of the M&C.                                                       |
| Parenting education and programs | Access to support related to parenting, child development and bonding.                                                                             | Opportunity to participate in parenting programs                                                                                                                       |
| Resources for the child          | Sufficient resources to support healthcare, sleep, food, clothing, physical activities and education needs for the child (38, 43) (40, 41, 46, 52) | Appropriate resource allocation of M&Cs whereby the provision of all needs for the child and mother are commensurate to those outside a custodial setting              |

|                                   |                         |                                                                                                                                                                         |                                                                                                                                        |
|-----------------------------------|-------------------------|-------------------------------------------------------------------------------------------------------------------------------------------------------------------------|----------------------------------------------------------------------------------------------------------------------------------------|
|                                   | Nutrition               | Nutritious food for the child (47, 52)                                                                                                                                  | Provision of nutritious food for children's growth and development                                                                     |
|                                   | Breastfeeding           | Adequate provision to meet the breastfeeding needs of mother(46) (40, 52)                                                                                               | Provision of all requirements for breastfeeding, including adequate nutrition, breast pumps and safe storage of expressed breast milk  |
|                                   | Cultural practices      | Inclusion of cultural parenting practices (54)                                                                                                                          | Supporting mothers to incorporate their cultural parenting practices and maintain connection to the community                          |
|                                   | Pregnancy               | Support women during pregnancy and post-partum(31, 40)and provide access to mental health support (30, 42)                                                              | Provision of adequate pre-natal and post-partum care consistent with comparable care outside, including mental health support services |
|                                   | Parenting autonomy      | Ability to parent their children in their own way.(42)                                                                                                                  | Capacity for mothers to have appropriate agency and autonomy in parenting style free from judgement                                    |
| <b>Systems and organisational</b> | Staff training for M&Cs | Staff worried about children's safety (61)and providing care for the children.(37)<br>Additional training in providing care of children residing in a M&C. (31, 37, 61) | Specific training for all M&C staff in the care and needs of children and mothers and the unique challenges of a M&C                   |
